# Supplementary material for: Synthesis, structural characterization and anion-, cation- and solvent-induced tuning of photophysical properties of a bimetallic Ru(ii) complex: combined experimental and DFT/TDDFT investigation
Source: Royal Society of Chemistry journal article supplement (doi:10.1039/c3ra41114a), 2013-01-01
Supplement: c3ra41114a.pdf [file c3ra41114a.pdf]

## Electronic Supplementary Information

### Synthesis, structural characterization and anion-, cation-, and solvent induced tuning of photophysical properties of a bimetallic Ru(II) complex: combined experimental and DFT/TDDFT investigation

Debasish Saha,<sup>a</sup> Shyamal Das,<sup>a</sup> Srikanta Karmakar,<sup>a</sup> Supriya Dutta<sup>b</sup>  
and Sujoy Baitalik<sup>\*a</sup>

---

<sup>a</sup> Department of Chemistry, Inorganic Chemistry Section, Jadavpur University, Kolkata 700 032, India. E-mail: [sbaitalik@hotmail.com](mailto:sbaitalik@hotmail.com); Fax: + 91 3324146584; Tel: + 91 33 24146666

<sup>b</sup> Department of Chemistry, Budge Budge Institute of Technology, Kolkata 700137, India.

\* To whom correspondence should be addressed: E-mail: [sbaitalik@hotmail.com](mailto:sbaitalik@hotmail.com)

## Tables for supporting information

**Table S1** Selected calculated bond distances (Å) and angles (deg) for [(bpy)<sub>2</sub>Ru(H<sub>2</sub>PyImPhen)Ru(bpy)<sub>2</sub>](ClO<sub>4</sub>)<sub>4</sub>·4H<sub>2</sub>O (**1**) and [(bpy)<sub>2</sub>Ru(H<sub>2</sub>PyImPhen)Ru(bpy)<sub>2</sub>](ClO<sub>4</sub>)<sub>4</sub>· (**2**)

| <b>1</b>           |        |        |             |        |        | <b>2</b>   |        |        |             |        |        |
|--------------------|--------|--------|-------------|--------|--------|------------|--------|--------|-------------|--------|--------|
|                    |        | gas    | soln        |        |        | gas        | soln   |        |             | Gas    | soln   |
| Ru1-N5             | 2.1183 | 2.1136 | Ru2-N1      | 2.1204 | 2.1133 | Ru1-N5     | 2.1073 | 2.1104 | Ru2-N1      | 2.1073 | 2.1104 |
| Ru1-N6             | 2.1178 | 2.1117 | Ru2-N2      | 2.1207 | 2.1121 | Ru1-N6     | 2.1192 | 2.1129 | Ru2-N2      | 2.1192 | 2.1129 |
| Ru1-N7             | 2.1207 | 2.1121 | Ru2-N3      | 2.1178 | 2.1117 | Ru1-N7     | 2.1188 | 2.1141 | Ru2-N3      | 2.1188 | 2.1141 |
| Ru1-N8             | 2.1204 | 2.1133 | Ru2-N4      | 2.1183 | 2.1136 | Ru1-N8     | 2.1063 | 2.1113 | Ru2-N4      | 2.1063 | 2.1113 |
| Ru1-N9             | 2.1276 | 2.1194 | Ru2-N16     | 2.1276 | 2.1194 | Ru1-N9     | 2.1135 | 2.1180 | Ru2-N16     | 2.1170 | 2.1189 |
| Ru1-N10            | 2.1265 | 2.1202 | Ru2-N17     | 2.1265 | 2.1202 | Ru1-N10    | 2.1170 | 2.1189 | Ru2-N17     | 2.1135 | 2.1180 |
| <b>Bond angles</b> |        |        |             |        |        |            |        |        |             |        |        |
| N5-Ru1-N6          | 77.54  | 77.66  | N1-Ru2-N2   | 77.50  | 77.65  | N5-Ru1-N6  | 77.52  | 77.64  | N1-Ru2-N2   | 77.52  | 77.64  |
| N5-Ru1-N7          | 96.87  | 97.38  | N1-Ru2-N3   | 96.79  | 97.08  | N5-Ru1-N7  | 99.06  | 97.64  | N1-Ru2-N3   | 99.06  | 97.64  |
| N5-Ru1-N8          | 172.24 | 172.94 | N1-Ru2-N4   | 172.22 | 172.94 | N5-Ru1-N8  | 175.29 | 173.47 | N1-Ru2-N4   | 175.29 | 173.48 |
| N5-Ru1-N9          | 89.04  | 88.05  | N1-Ru2-N16  | 97.01  | 97.31  | N5-Ru1-N9  | 87.71  | 88.42  | N1-Ru2-N16  | 96.13  | 97.01  |
| N5-Ru1-N10         | 97.64  | 97.16  | N1-Ru2-N17  | 88.42  | 88.46  | N5-Ru1-N10 | 96.14  | 97.10  | N1-Ru2-N17  | 87.71  | 88.42  |
| N6-Ru1-N7          | 88.27  | 88.86  | N2-Ru2-N3   | 88.27  | 88.86  | N6-Ru1-N7  | 89.44  | 89.04  | N2-Ru2-N3   | 89.43  | 89.04  |
| N6-Ru1-N8          | 96.79  | 97.08  | N2-Ru2-N4   | 96.87  | 97.38  | N6-Ru1-N8  | 99.05  | 97.66  | N2-Ru2-N4   | 99.06  | 97.66  |
| N6-Ru1-N9          | 97.25  | 96.64  | N2-Ru2-N16  | 172.68 | 172.99 | N6-Ru1-N9  | 95.84  | 96.57  | N2-Ru2-N16  | 172.04 | 172.88 |
| N6-Ru1-N10         | 173.39 | 172.96 | N2-Ru2-N17  | 96.86  | 96.59  | N6-Ru1-N10 | 172.04 | 172.88 | N2-Ru2-N17  | 95.84  | 96.57  |
| N7-Ru1-N8          | 77.50  | 77.65  | N3-Ru2-N4   | 77.54  | 77.66  | N7-Ru1-N8  | 77.55  | 77.62  | N3-Ru2-N4   | 77.55  | 77.62  |
| N7-Ru1-N9          | 172.68 | 172.99 | N3-Ru2-N16  | 97.25  | 96.64  | N7-Ru1-N9  | 172.20 | 172.52 | N3-Ru2-N16  | 96.38  | 96.37  |
| N7-Ru1-N10         | 96.86  | 96.59  | N3-Ru2-N17  | 173.39 | 172.96 | N7-Ru1-N10 | 96.37  | 96.37  | N3-Ru2-N17  | 172.21 | 172.52 |
| N8-Ru1-N9          | 97.01  | 97.31  | N4-Ru2-N16  | 89.04  | 88.055 | N8-Ru1-N9  | 95.90  | 96.66  | N4-Ru2-N16  | 87.54  | 88.05  |
| N8-Ru1-N10         | 88.41  | 88.46  | N4-Ru2-N17  | 97.64  | 97.16  | N8-Ru1-N10 | 87.54  | 88.05  | N4-Ru2-N17  | 95.90  | 96.66  |
| N9-Ru1-N10         | 77.10  | 78.28  | N16-Ru2-N17 | 77.10  | 78.28  | N9-Ru1-N10 | 78.95  | 78.47  | N16-Ru2-N17 | 78.95  | 78.47  |

**Table S2** Selected calculated bond distances (Å) and angles (deg) for **1·Zn**

| <b>1·Zn</b> |        |             |        |
|-------------|--------|-------------|--------|
| Ru1-N5      | 2.1137 | Ru2-N1      | 2.1149 |
| Ru1-N6      | 2.1124 | Ru2-N2      | 2.1120 |
| Ru1-N7      | 2.1120 | Ru2-N3      | 2.1123 |
| Ru1-N8      | 2.1149 | Ru2-N4      | 2.1137 |
| Ru1-N9      | 2.1170 | Ru2-N16     | 2.1197 |
| Ru1-N10     | 2.1197 | Ru2-N17     | 2.1170 |
| Zn-N13      | 2.1660 | Zn-N12      | 2.3461 |
| Zn-N15      | 2.3471 |             |        |
| <hr/>       |        |             |        |
| N5-Ru1-N6   | 77.66  | N1-Ru2-N2   | 77.66  |
| N5-Ru1-N7   | 96.97  | N1-Ru2-N3   | 97.01  |
| N5-Ru1-N8   | 172.60 | N1-Ru2-N4   | 172.60 |
| N5-Ru1-N9   | 88.61  | N1-Ru2-N16  | 88.80  |
| N5-Ru1-N10  | 96.95  | N1-Ru2-N17  | 97.16  |
| N6-Ru1-N7   | 88.87  | N2-Ru2-N3   | 88.87  |
| N6-Ru1-N8   | 96.99  | N2-Ru2-N4   | 96.97  |
| N6-Ru1-N9   | 96.76  | N2-Ru2-N16  | 96.70  |
| N6-Ru1-N10  | 172.72 | N2-Ru2-N17  | 172.81 |
| N7-Ru1-N8   | 77.66  | N3-Ru2-N4   | 77.66  |
| N7-Ru1-N9   | 172.82 | N3-Ru2-N16  | 172.72 |
| N7-Ru1-N10  | 96.70  | N3-Ru2-N17  | 96.77  |
| N8-Ru1-N9   | 97.16  | N4-Ru2-N16  | 96.94  |
| N8-Ru1-N10  | 88.80  | N4-Ru2-N17  | 88.62  |
| N9-Ru1-N10  | 78.07  | N16-Ru2-N17 | 78.07  |
| N12-Zn-N13  | 74.39  | N13-Zn-N15  | 74.37  |
|             |        | N12-Zn-N15  | 148.76 |

**Table S3** Selected MOs along with their energies and compositions for **1·Zn**

| MO     | Energy, eV | (%) Composition  |                  |        |       |
|--------|------------|------------------|------------------|--------|-------|
|        | <b>3</b>   | Ru <sup>II</sup> | Zn <sup>II</sup> | Ligand | bpy   |
| HOMO-3 | -6.634     | 79.62            | 0.02             | 10.57  | 9.79  |
| HOMO-2 | -6.623     | 77.23            | 0.01             | 13.26  | 9.49  |
| HOMO-1 | -6.491     | 84.82            | 0.00             | 5.32   | 9.85  |
| HOMO   | -6.491     | 84.81            | 0.00             | 5.34   | 9.85  |
| LUMO   | -3.232     | 0.33             | 2.24             | 93.13  | 4.30  |
| LUMO+1 | -3.116     | 1.51             | 0.02             | 92.80  | 5.67  |
| LUMO+2 | -2.998     | 4.57             | 1.09             | 78.81  | 15.52 |
| LUMO+3 | -2.967     | 3.29             | 0.17             | 79.47  | 17.07 |

**Table S4** Photophysical data for **1** in binary solvent mixture

|                                          |                | CH <sub>2</sub> Cl <sub>2</sub> : DMF |                   |                      | H <sub>2</sub> O : CH <sub>3</sub> CN    |                |                       |                   |                      |
|------------------------------------------|----------------|---------------------------------------|-------------------|----------------------|------------------------------------------|----------------|-----------------------|-------------------|----------------------|
| CH <sub>2</sub> Cl <sub>2</sub><br>: DMF | $\tau$<br>[ns] | $\phi \times 10^{-1}$                 | $K_r \times 10^5$ | $K_{nr} \times 10^6$ | H <sub>2</sub> O<br>: CH <sub>3</sub> CN | $\tau$<br>[ns] | $\phi \times 10^{-1}$ | $K_r \times 10^5$ | $K_{nr} \times 10^6$ |
| 10:0                                     | 410            | 1.10                                  | 2.68              | 2.17                 | 10:0                                     | 500            | 1.14                  | 2.28              | 1.77                 |
| 9:1                                      | 397            | 1.08                                  | 2.72              | 2.25                 | 9:1                                      | 437            | 0.95                  | 2.17              | 2.07                 |
| 8:2                                      | 344            | 0.98                                  | 2.85              | 2.62                 | 8:2                                      | 352            | 0.92                  | 2.61              | 2.58                 |
| 7:3                                      | 323            | 0.88                                  | 2.72              | 2.82                 | 7:3                                      | 240            | 0.71                  | 2.96              | 3.87                 |
| 6:4                                      | 293            | 0.74                                  | 2.53              | 3.16                 | 6:4                                      | 225            | 0.59                  | 2.62              | 4.18                 |
| 5:5                                      | 280            | 0.69                                  | 2.46              | 3.33                 | 5:5                                      | 205            | 0.55                  | 2.68              | 4.61                 |
| 4:6                                      | 264            | 0.62                                  | 2.35              | 3.55                 | 4:6                                      | 190            | 0.50                  | 2.63              | 5.00                 |
| 3:7                                      | 237            | 0.57                                  | 2.41              | 3.98                 | 3:7                                      | 181            | 0.45                  | 2.49              | 5.28                 |
| 2:8                                      | 225            | 0.53                                  | 2.36              | 4.21                 | 2:8                                      | 171            | 0.43                  | 2.51              | 5.60                 |
| 1:9                                      | 208            | 0.49                                  | 2.40              | 4.66                 | 1:9                                      | 165            | 0.41                  | 2.48              | 5.81                 |
| 0:10                                     | 202            | 0.42                                  | 2.09              | 4.74                 | 0:10                                     | 163            | 0.40                  | 2.42              | 5.89                 |

## Figures for Electronic Supplementary Information

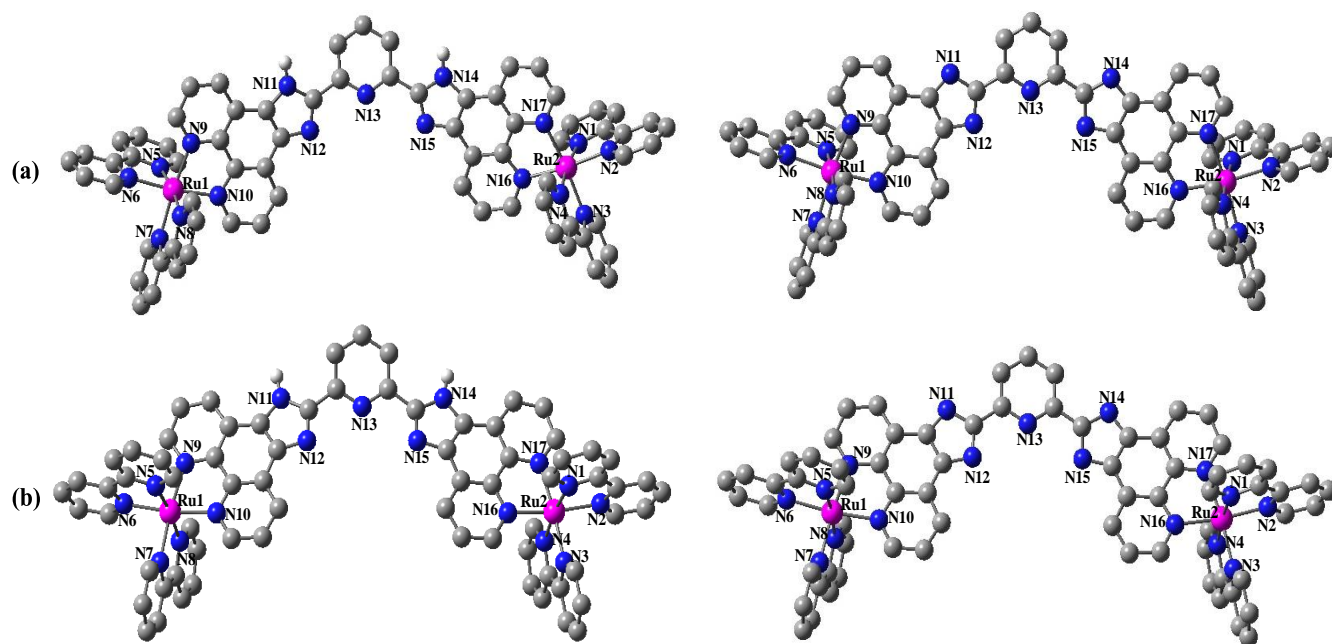

**Fig. S1** Optimized geometries and labeling schemes of  $[(bpy)_2Ru(H_2PyImPhen)Ru(bpy)_2](ClO_4)_4 \cdot 4H_2O$  (**1**) and  $[(bpy)_2Ru(PyImPhen)Ru(bpy)_2](ClO_4)_2$  (**2**) in gas (a) and solution phase (b).

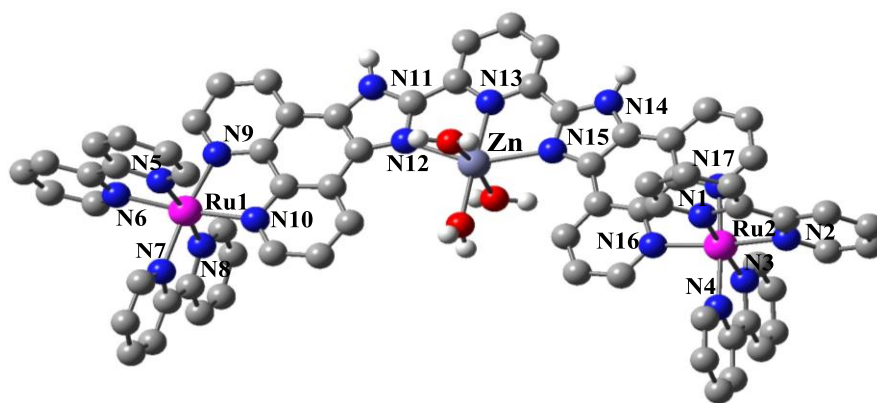

**Fig. S2** Optimized geometries and labeling schemes of **1·Zn** in solution phase.

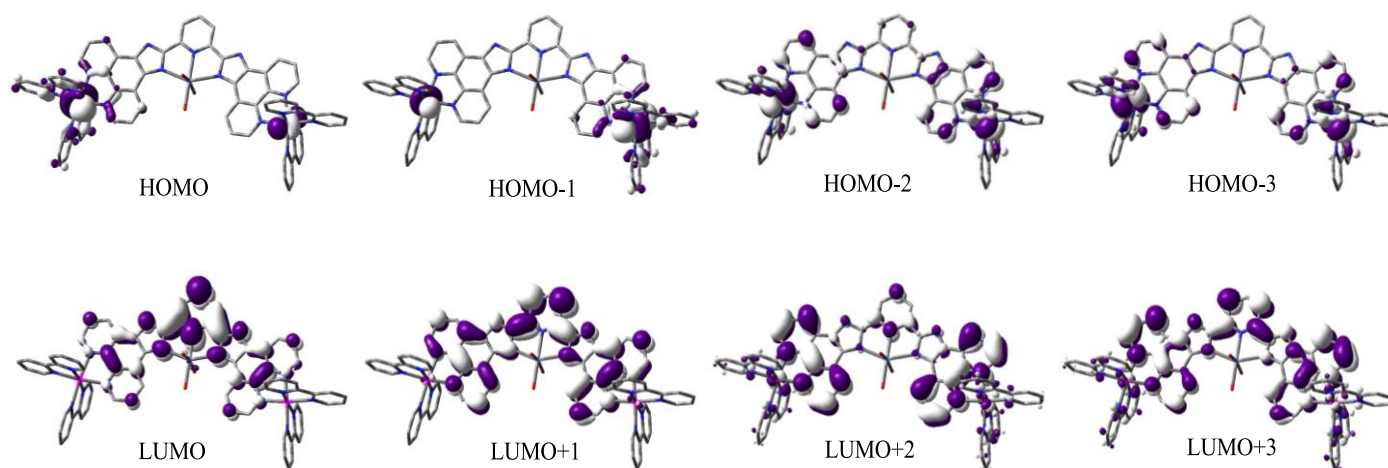

**Fig. S3** Schematic drawings of the selective frontier molecular orbitals for  $1 \cdot \text{Zn}$  in solution phase.



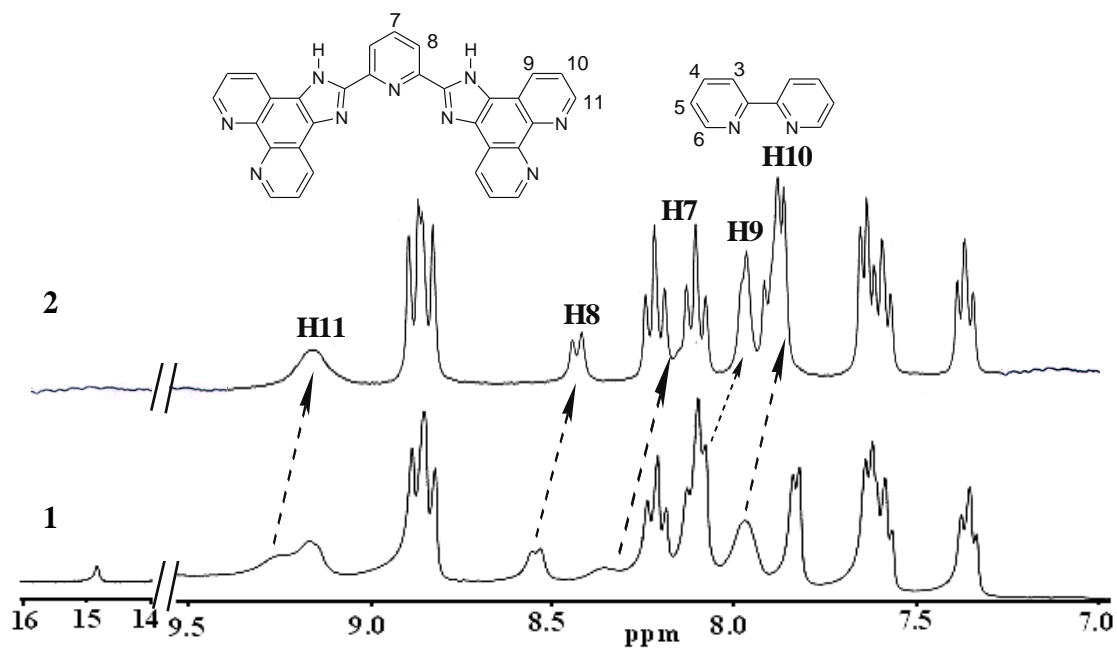

**Fig. S4**  $^1\text{H}$  spectra of  $[(\text{bpy})_2\text{Ru}(\text{H}_2\text{PyImPhen})\text{Ru}(\text{bpy})_2](\text{ClO}_4)_4 \cdot 4\text{H}_2\text{O}$  (**1**) (below) and  $[(\text{bpy})_2\text{Ru}(\text{PyImPhen})\text{Ru}(\text{bpy})_2](\text{ClO}_4)_2$  (**2**) (above) in  $\text{DMSO}-d_6$ .

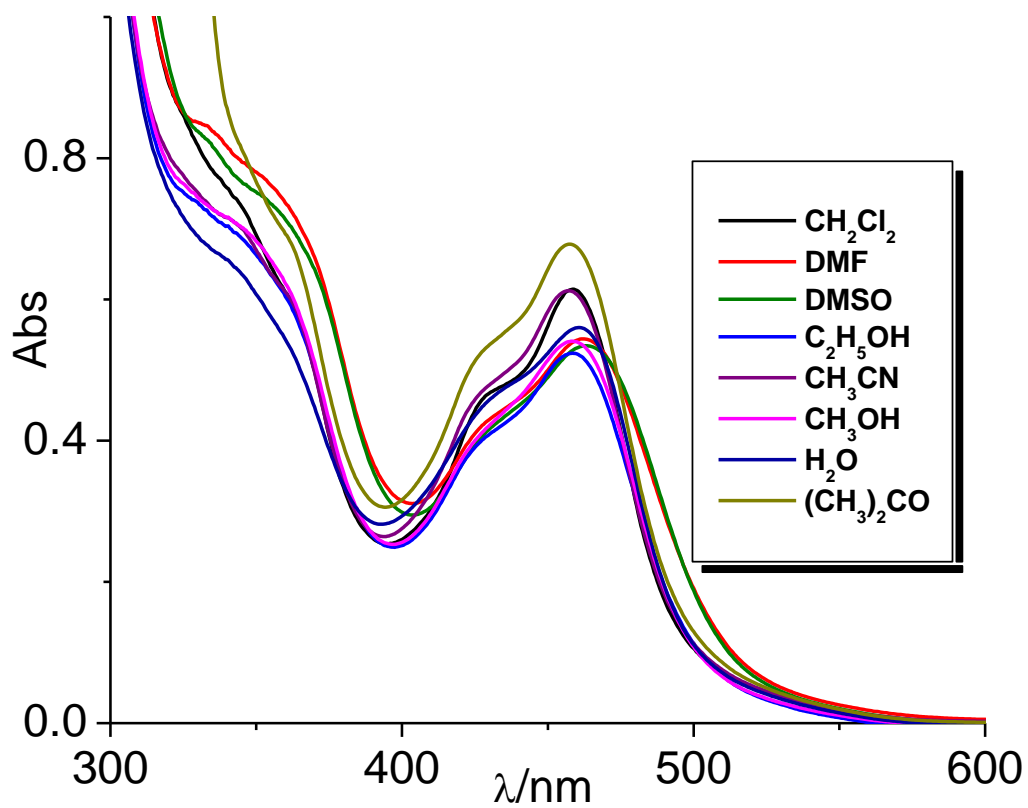

**Fig. S5** UV-vis spectra of  $[(bpy)_2Ru(H_2PyImPhen)Ru(bpy)_2](ClO_4)_4 \cdot 4H_2O$  (1) in different solvents.

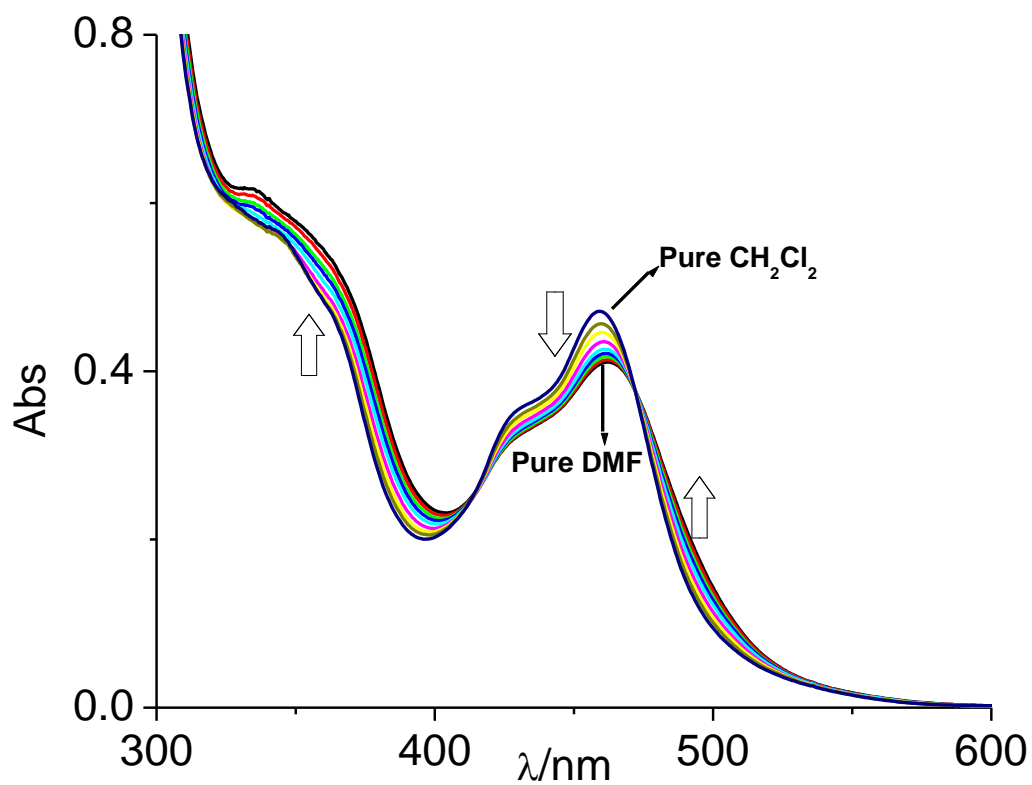

**Fig. S6** Changes in UV-vis spectra of  $[(bpy)_2Ru(H_2PyImPhen)Ru(bpy)_2](ClO_4)_4 \cdot 4H_2O$  (1) on incremental addition of DMF in  $CH_2Cl_2$ .

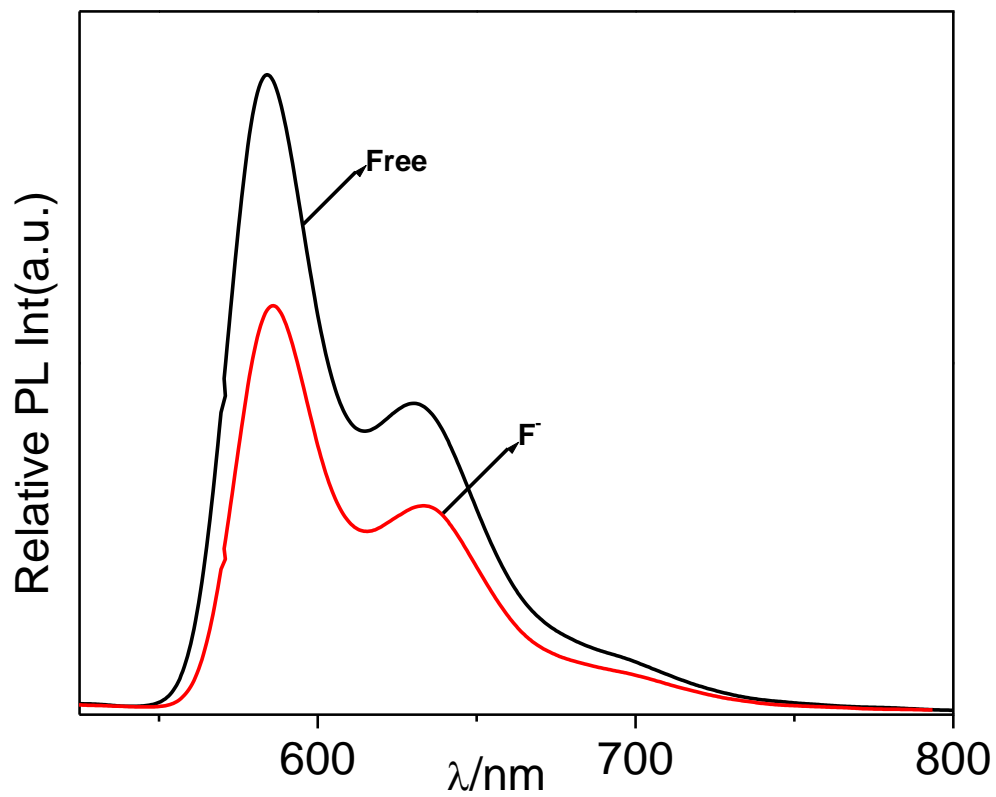

**Fig. S7** Luminescence spectra of  $[(bpy)_2Ru(H_2PyImPhen)Ru(bpy)_2](ClO_4)_4 \cdot 4H_2O$  (**1**) in presence (red line) and in absence (black line) of  $F^-$  at 77 K in 4:1 ethanol–methanol glass.

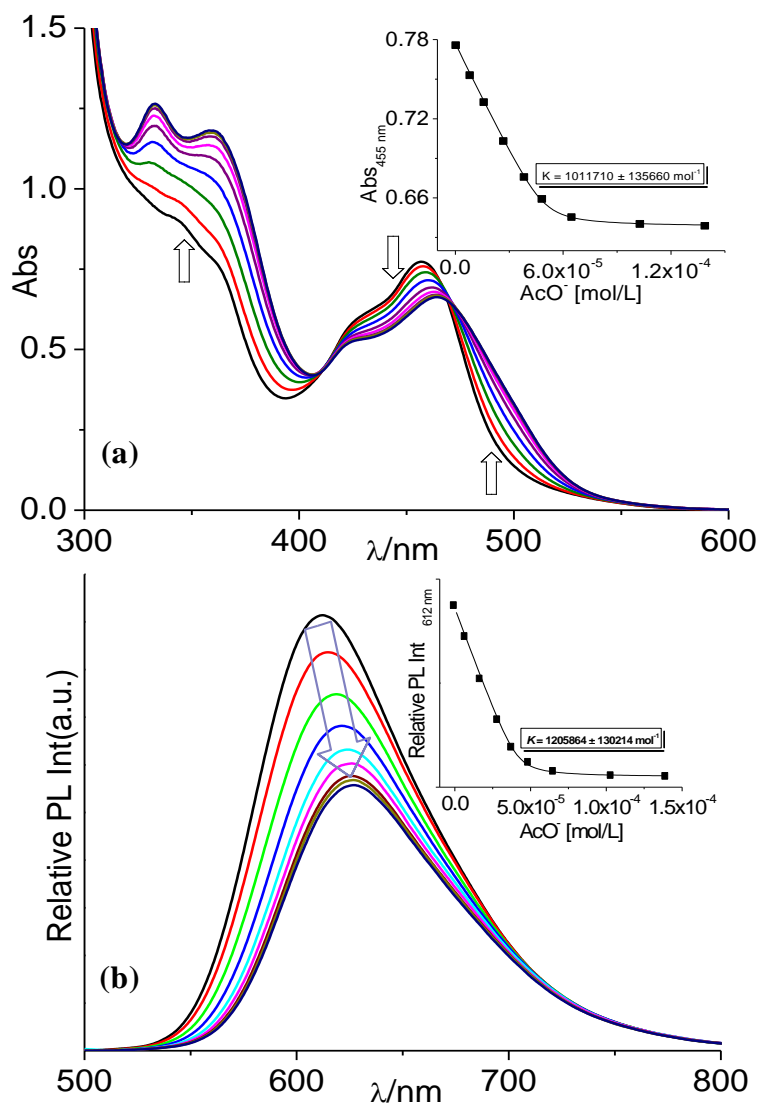

**Fig. S8** Changes in UV-vis (a) and photoluminescence (b) spectra of [(bpy)<sub>2</sub>Ru(H<sub>2</sub>PyImPhen)Ru(bpy)<sub>2</sub>](ClO<sub>4</sub>)<sub>4</sub>·4H<sub>2</sub>O (1) in acetonitrile upon addition of AcO<sup>-</sup> ion. Inset shows the fit of the experimental emission data to a 1:1 binding profile.

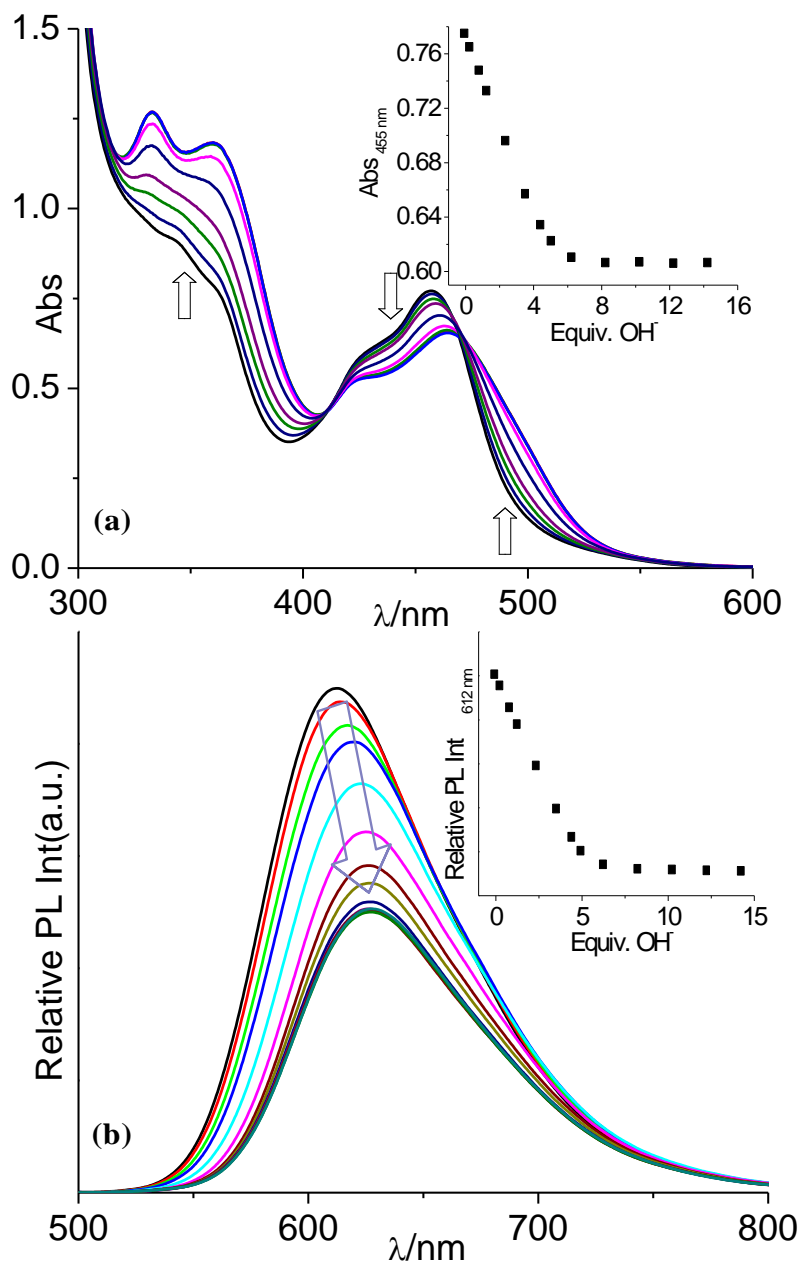

**Fig. S9** Changes in UV-vis (a) and photoluminescence (b) spectra of  $[(\text{bpy})_2\text{Ru}(\text{H}_2\text{PyImPhen})\text{Ru}(\text{bpy})_2](\text{ClO}_4)_4 \cdot 4\text{H}_2\text{O}$  (1) in acetonitrile upon addition of  $\text{OH}^-$  ion. The inset shows the change of absorption and emission intensity as a function of the equivalent of  $\text{OH}^-$  ion added.

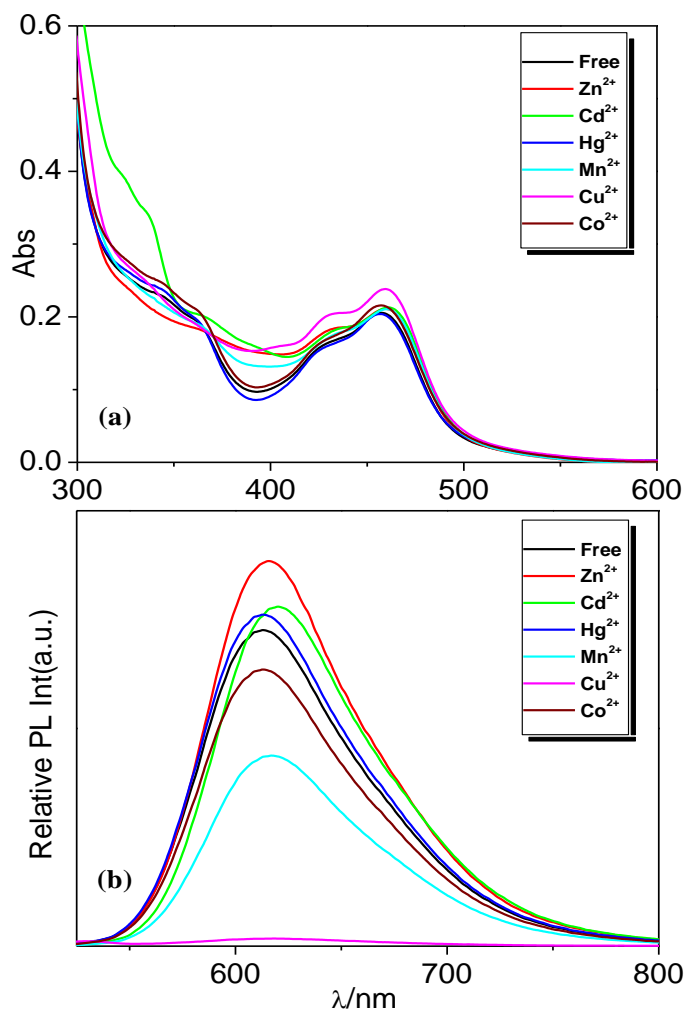

**Fig. S10** Changes in UV-vis (a) and photoluminescence (b) spectra of [(bpy)<sub>2</sub>Ru(H<sub>2</sub>Py ImPhen)Ru(bpy)<sub>2</sub>](ClO<sub>4</sub>)<sub>4</sub>·4H<sub>2</sub>O (**1**) in acetonitrile upon addition of different cations as perchlorate salts.

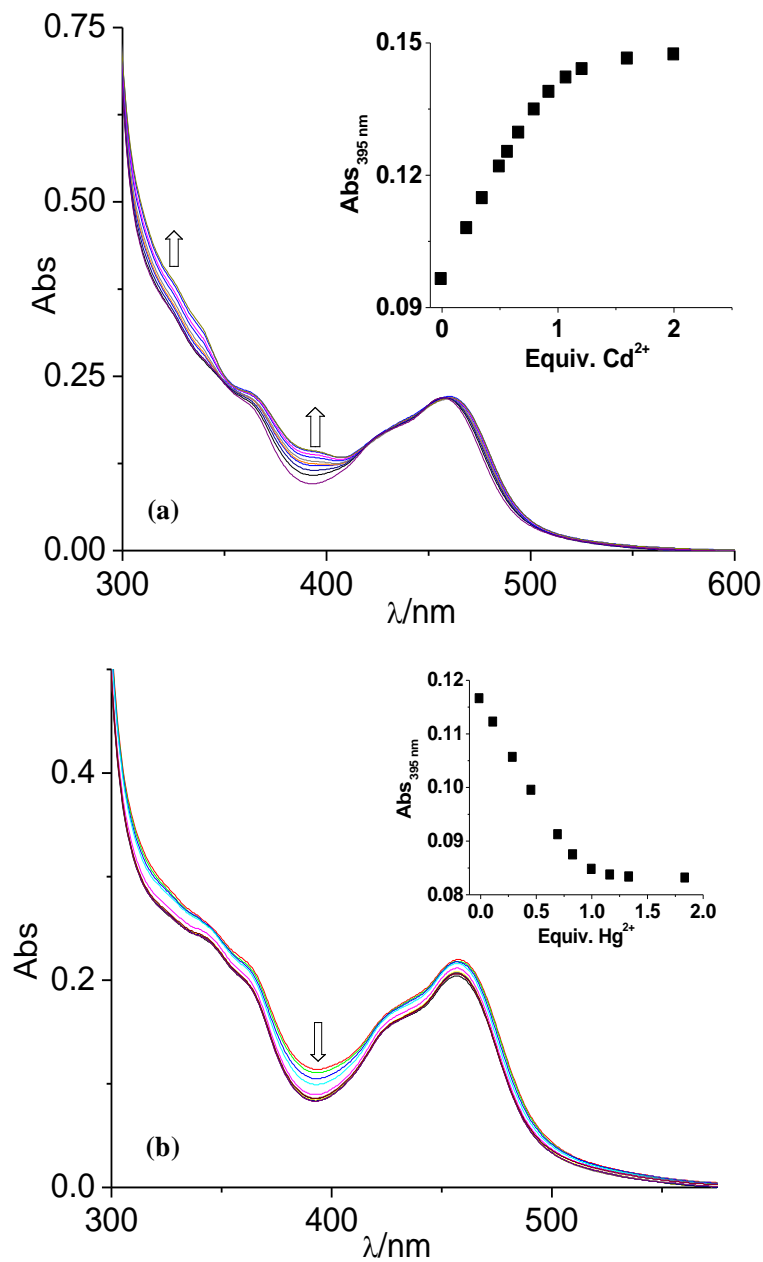

**Fig. S11** Changes in UV-vis spectra of  $[(bpy)_2Ru(H_2PyImPhen)Ru(bpy)_2](ClO_4)_4 \cdot 4H_2O$  (**1**) in acetonitrile upon addition of  $Cd^{2+}$  (a) and  $Hg^{2+}$  (b). The inset shows the change of absorption and emission intensity as a function of the equivalent of  $Cd^{2+}$  and  $Hg^{2+}$  ions added.



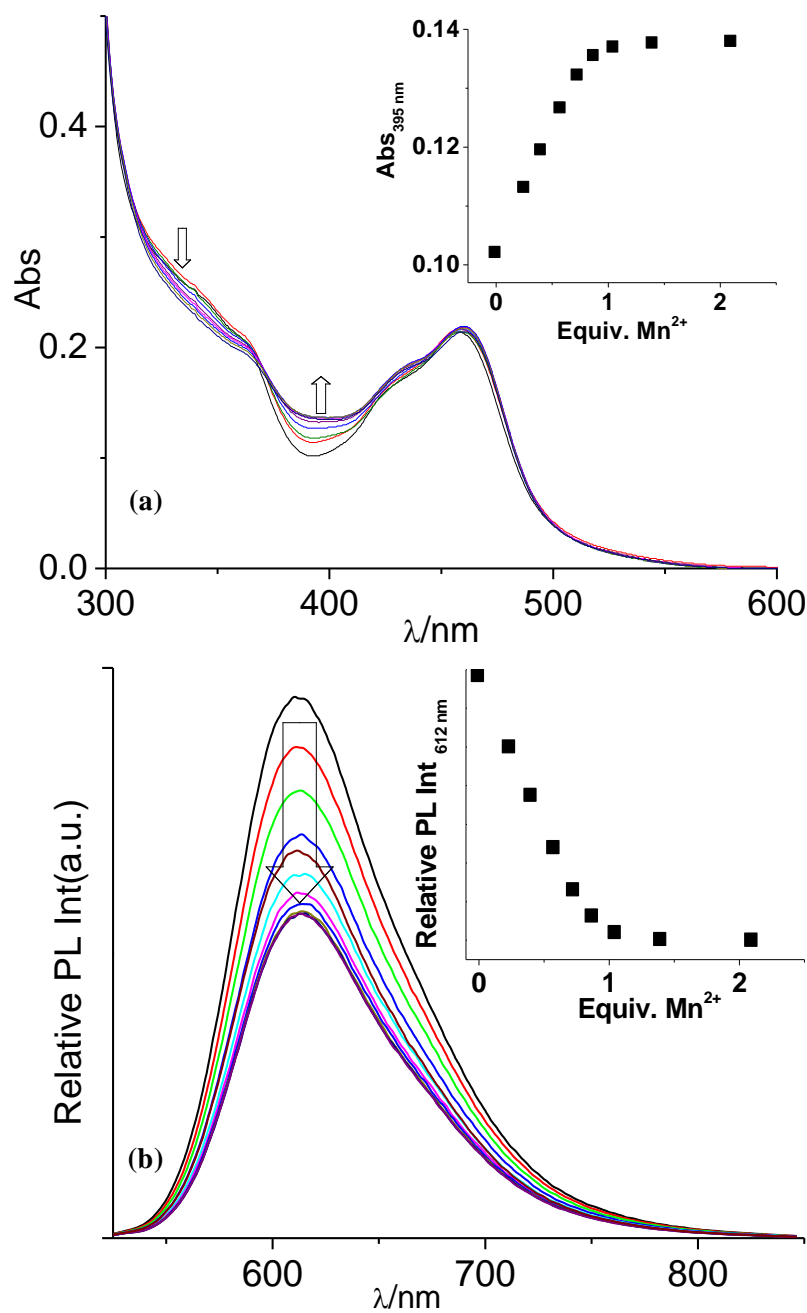

**Fig. S12** Changes in UV-vis (a) and photoluminescence (b) spectra of  $[(bpy)_2Ru(H_2PyImPhen)Ru(bpy)_2](ClO_4)_4 \cdot 4H_2O$  (**1**) in acetonitrile upon addition of  $Mn(ClO_4)_2$ . The inset shows the change of absorption and emission intensity as a function of the equivalent of  $Mn^{2+}$  ions added.

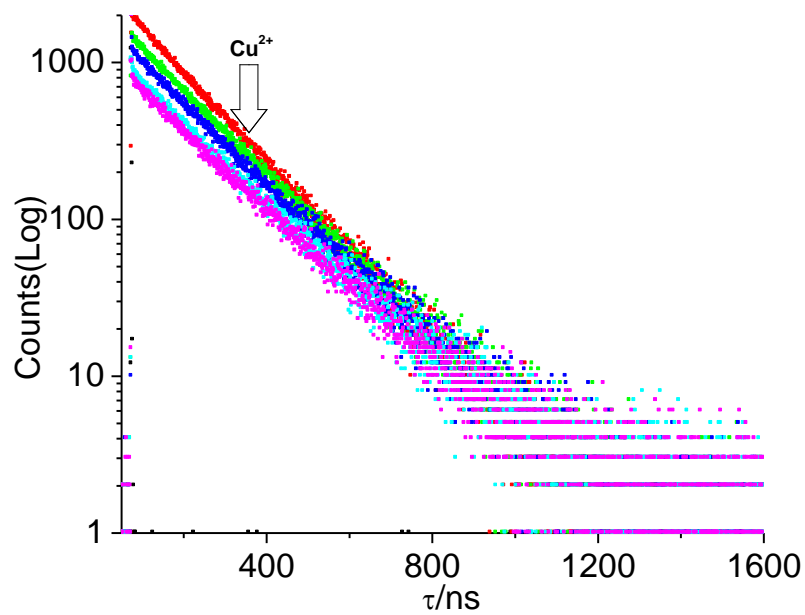

**Fig. S13** Changes in time-resolved decay profiles of  $[(\text{bpy})_2\text{Ru}(\text{H}_2\text{PyImPhen})\text{Ru}(\text{bpy})_2](\text{ClO}_4)_4 \cdot 4\text{H}_2\text{O}$  (**1**) in acetonitrile as function of the incremental addition of  $\text{Cu}^{2+}$ .

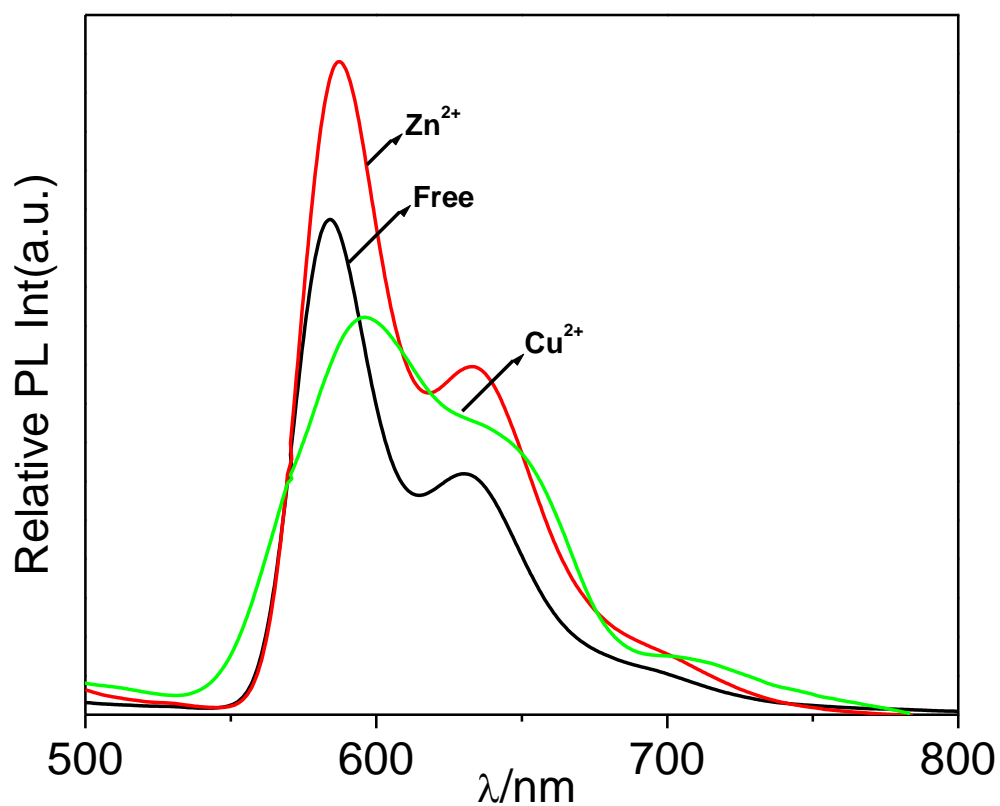

**Fig. S14** Photoluminescence spectra of  $[(bpy)_2Ru(H_2PyImPhen)Ru(bpy)_2](ClO_4)_4 \cdot 4H_2O$  (**1**) in absence (black line) and in presence of  $Zn^{2+}$  (red line) and  $Cu^{2+}$  (green) ions in ethanol-methanol (4:1) glass at 77 K.

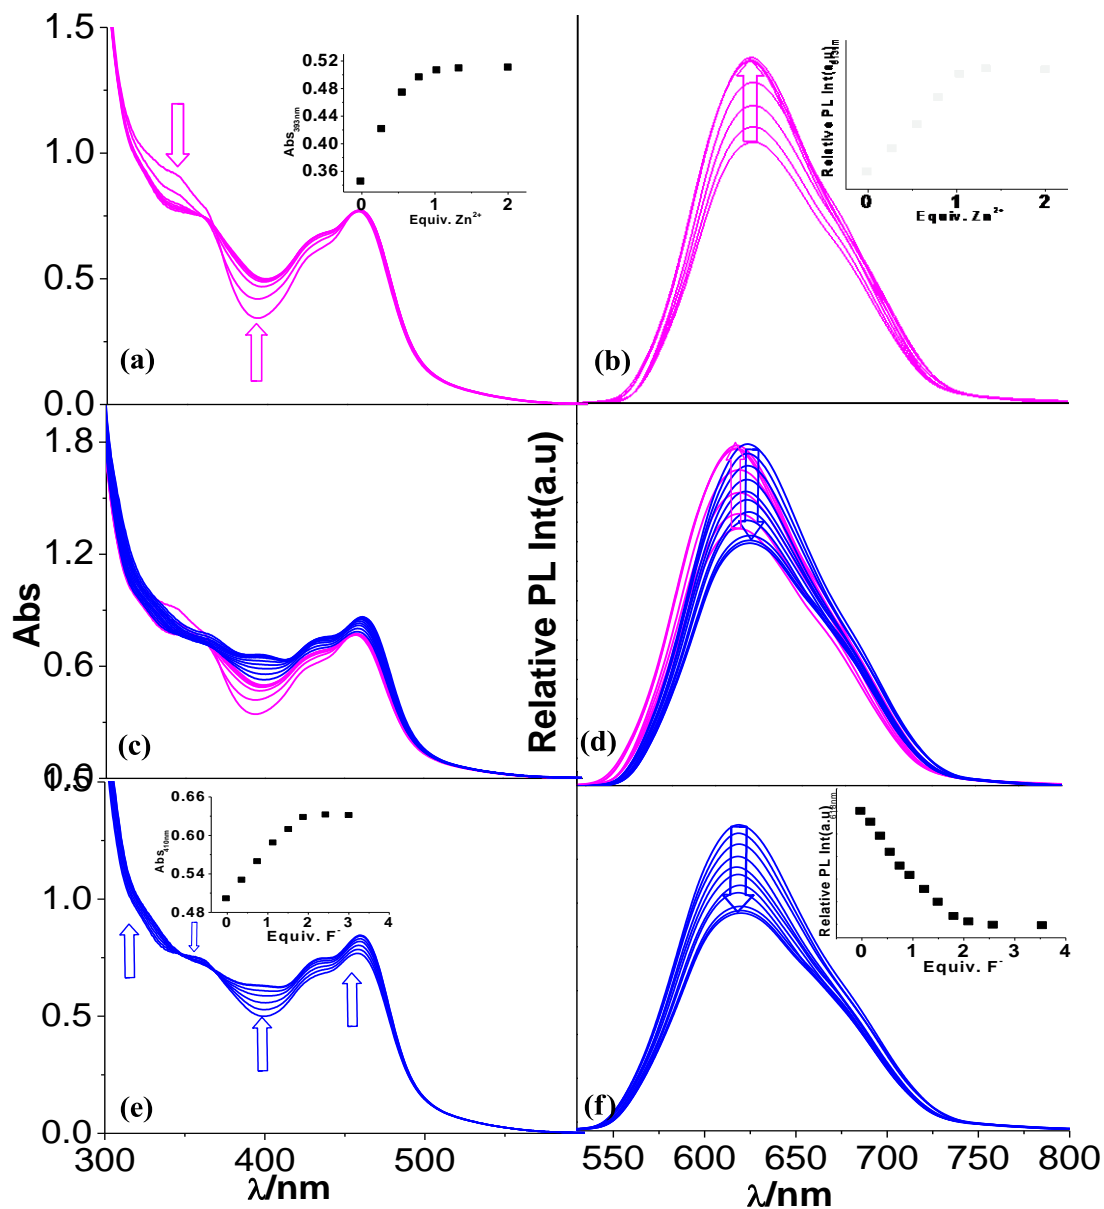

**Fig. S15** Changes in UV-vis (a,c,e) and photoluminescence (b,d,f) spectra of **1** upon sequential incremental addition of  $Zn^{2+}$  and  $F^-$  ions in acetonitrile.
